# Supplementary material for: Phytochemical Characterization and Biological Activities of Essential Oil from Satureja montana L., a Medicinal Plant Grown under the Influence of Fertilization and Planting Dates
Source: MDPI journal article supplement (doi:10.3390/biology13050328), 2024-05-08
Supplement: s1 [file s1]

**Table S1.** Analysis of statistical significance (p-value) of sowing date and N-P fertilization for fresh weight, oil content and oil yield.

| Parameter                                     | Fertilization (F) | Date of sowing (D) | Fertilization x Date of sowing (D x F) |
|-----------------------------------------------|-------------------|--------------------|----------------------------------------|
| Fresh weight (g per plant) in the first cut   | p < 0.001         | p < 0.001          | p < 0.001                              |
| Fresh weight (g per plant) in the second cut  | p < 0.001         | p < 0.001          | p = 0.001                              |
| Oil content (mL/100g FW) in the first cut     | p < 0.001         | p < 0.001          | p < 0.001                              |
| Oil content (mL/100g FW) in the second cut    | p < 0.001         | p < 0.001          | p = 0.050                              |
| Oil yield (mL per plant FW) in the first cut  | p < 0.001         | p < 0.001          | p < 0.001                              |
| Oil yield (mL per plant FW) in the second cut | p < 0.001         | p < 0.001          | p = 0.001                              |

**Table S2.** Effect of fertilization with N and P as well as their combination on the trace constituents of *S. montana* essential oil at 2<sup>nd</sup> cut in the second season during planting dates at 2<sup>nd</sup> cut in the second season.

| Component              | N0_P0 | N0_P37 | N0_P74 | N55_P0 | N55_P37 | N55_P74 | N110_P0 | N110_P37 | N110_P74 |
|------------------------|-------|--------|--------|--------|---------|---------|---------|----------|----------|
| <b>October</b>         |       |        |        |        |         |         |         |          |          |
| $\alpha$ -thujene      | 0.21  | 0.24   | 0.22   | 0.24   | 0.26    | 0.21    | 0.41    | 0.20     | 0.19     |
| $\alpha$ -pinene       | 0.59  | 0.70   | 0.97   | 0.34   | 0.71    | 0.59    | 0.53    | 0.68     | 0.58     |
| $\beta$ -pinene        | 0.58  | 0.68   | 0.57   | 0.80   | 0.49    | 0.86    | 0.77    | 0.44     | 0.90     |
| 1-octen-3-ol           | 0.65  | 0.51   | 0.32   | 0.50   | 0.40    | 0.57    | 0.38    | 0.58     | 0.42     |
| $\alpha$ -Phellandrene | 0.54  | 0.53   | 0.60   | 0.46   | 0.44    | 0.61    | 0.32    | 0.11     | 0.27     |
| $\beta$ -myrcene       | 0.45  | 0.33   | 0.77   | 0.65   | 0.76    | 0.54    | 0.42    | 0.56     | 0.32     |
| $\alpha$ -terpinene    | 0.76  | 0.52   | 0.76   | 0.78   | 0.13    | 0.21    | 0.11    | 0.14     | 0.61     |
| limonene               | 0.75  | 0.21   | 0.23   | 0.43   | 0.31    | 0.42    | 0.50    | 0.22     | 0.33     |
| eucalyptol             | 0.17  | 0.25   | 0.21   | 0.22   | 0.42    | 0.20    | 0.12    | 0.58     | 0.46     |
| 1-terpinen-4-ol        | 0.60  | 0.45   | 0.38   | 0.71   | 0.62    | 0.97    | 0.88    | 0.87     | 0.85     |
| Germacrene D           | 0.61  | 0.55   | 0.40   | 0.32   | 0.52    | 0.31    | 0.19    | 0.21     | 0.21     |
| caryophyllene oxide    | 0.34  | 0.24   | 0.60   | 0.52   | 0.66    | 0.33    | 0.48    | 0.44     | 0.23     |
| <b>March</b>           |       |        |        |        |         |         |         |          |          |
| $\alpha$ -thujene      | 0.21  | 0.24   | 0.22   | 0.24   | 0.26    | 0.21    | 0.41    | 0.20     | 0.19     |
| $\alpha$ -pinene       | 0.59  | 0.70   | 0.97   | 0.34   | 0.71    | 0.59    | 0.53    | 0.68     | 0.58     |
| $\beta$ -pinene        | 0.58  | 0.68   | 0.57   | 0.80   | 0.49    | 0.86    | 0.77    | 0.44     | 0.90     |
| 1-octen-3-ol           | 0.65  | 0.51   | 0.32   | 0.50   | 0.40    | 0.57    | 0.38    | 0.58     | 0.42     |
| $\alpha$ -Phellandrene | 0.54  | 0.53   | 0.60   | 0.46   | 0.44    | 0.61    | 0.32    | 0.11     | 0.27     |
| $\beta$ -myrcene       | 0.45  | 0.33   | 0.77   | 0.65   | 0.76    | 0.54    | 0.42    | 0.56     | 0.32     |
| $\alpha$ -terpinene    | 0.76  | 0.52   | 0.76   | 0.78   | 0.13    | 0.21    | 0.11    | 0.14     | 0.61     |
| limonene               | 0.75  | 0.21   | 0.23   | 0.43   | 0.31    | 0.42    | 0.50    | 0.22     | 0.33     |
| eucalyptol             | 0.17  | 0.25   | 0.21   | 0.22   | 0.42    | 0.20    | 0.12    | 0.58     | 0.46     |
| 1-terpinen-4-ol        | 0.60  | 0.45   | 0.38   | 0.71   | 0.62    | 0.97    | 0.88    | 0.87     | 0.85     |
| Germacrene D           | 0.61  | 0.55   | 0.40   | 0.32   | 0.52    | 0.31    | 0.19    | 0.21     | 0.21     |
| caryophyllene oxide    | 0.34  | 0.24   | 0.60   | 0.52   | 0.66    | 0.33    | 0.48    | 0.44     | 0.23     |

**Table S3.** Effect of sowing date and fertilization with N and P as well as their combination on the major chemical compound groups of *S. montana* essential oil at 2<sup>nd</sup> cut in the second season.

| Fertilization<br>(F) | Monoterpene<br>hydrocarbones |       | Monoterpenes<br>oxygenated |       | Sesquiterpene<br>hydrocarbones |      | Sesquiterpenes<br>oxygenated |      |
|----------------------|------------------------------|-------|----------------------------|-------|--------------------------------|------|------------------------------|------|
|                      | Date of sowing (D)           |       |                            |       |                                |      |                              |      |
|                      | Oct                          | Mar   | Oct                        | Mar   | Oct                            | Mar  | Oct                          | Mar  |
| N0_P0                | 19.98                        | 19.98 | 70.57                      | 69.84 | 2.02                           | 2.24 | 0.34                         | 0.65 |
| N0_P37               | 16.62                        | 16.21 | 71.88                      | 73.06 | 1.75                           | 2.42 | 0.52                         | 0.62 |
| N0_P74               | 13.14                        | 12.51 | 73.53                      | 74.54 | 1.83                           | 1.68 | 0.66                         | 0.54 |
| N55_P0               | 18.13                        | 17.41 | 70.62                      | 70.80 | 1.88                           | 2.46 | 0.24                         | 0.62 |
| N55_P37              | 12.31                        | 11.76 | 76.47                      | 76.53 | 3.24                           | 2.86 | 0.33                         | 0.48 |
| N55_P74              | 11.63                        | 11.87 | 77.84                      | 79.00 | 2.93                           | 2.75 | 0.48                         | 0.29 |
| N110_P0              | 18.14                        | 18.13 | 70.30                      | 72.02 | 2.79                           | 2.73 | 0.60                         | 0.55 |
| N110_P37             | 9.24                         | 9.88  | 81.68                      | 82.29 | 3.02                           | 2.12 | 0.44                         | 0.47 |
| N110_P74             | 9.72                         | 8.97  | 84.41                      | 84.71 | 1.61                           | 2.21 | 0.23                         | 0.19 |
